## Correction

# Correction: Palm-Vein Classification Based on Principal Orientation Features

**The PLOS ONE Staff**

The second author's affiliation is incorrect. Yaqin Liu is not affiliated with #2 but with #1 School of biomedical engineering, Southern Medical University, Guangzhou 510515, China.

**Reference**

1. Zhou Y, Liu Y, Feng Q, Yang F, Huang J, et al. (2014) Palm-Vein Classification Based on Principal Orientation Features. PLoS ONE 9(11): e112429. doi:10.1371/journal.pone.0112429

---

**Citation:** The PLOS ONE Staff (2014) Correction: Palm-Vein Classification Based on Principal Orientation Features. PLoS ONE 9(12): e116446. doi:10.1371/journal.pone.0116446

**Published:** December 19, 2014

**Copyright:** © 2014 The PLOS ONE Staff. This is an open-access article distributed under the terms of the Creative Commons Attribution License, which permits unrestricted use, distribution, and reproduction in any medium, provided the original author and source are credited.
